# Supplementary material for: Alterations of the Innate Immune System in Susceptibility and Resilience After Social Defeat Stress
Source: PubMed Central journal article supplement (PMC6053497; doi:10.3389/fnbeh.2018.00141), 2018-07-13
Supplement: Image_1.pdf [file Image_1.pdf]

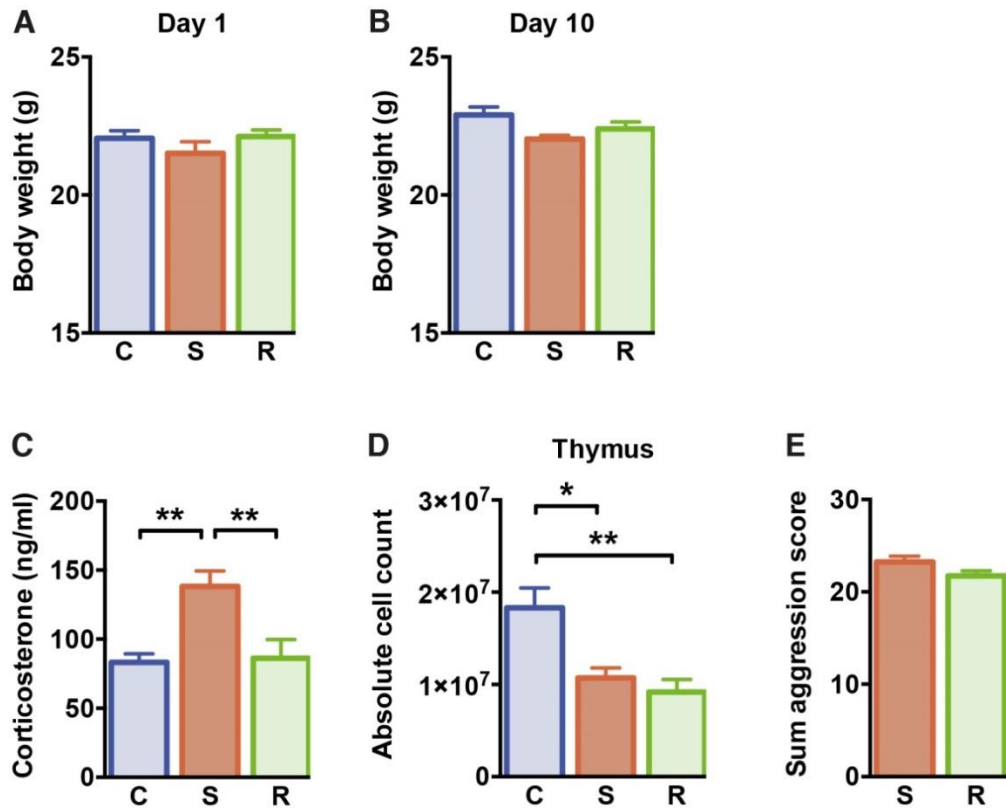

**Supplementary Figure 1.** A, B) Equivalent body weight of mice before and after 10 days of social defeat. During the 10 days of stress exposure mice of all groups gained about 0.5 to 1 g body weight.  $n_C = 16$ ,  $n_S = 15$ ,  $n_R = 15$ . C) Elevated corticosterone concentrations in the plasma of susceptible mice at day 12, two days after the end of the social defeat paradigm.  $n_C = 13$ ,  $n_S = 14$ ,  $n_R = 7$ . D) Decreased total numbers of thymocytes two days after 10 days of social defeat in susceptible and resilient mice.  $n_C = 4$ ,  $n_S = 5$ ,  $n_R = 5$ . E) The score of agonistic interactions did not differ between susceptible and resilient mice indicating that resilience did not result from differences in aversive experiences.  $n_S = 14$ ,  $n_R = 14$ . \*:  $p < .05$ , \*\*:  $p < .01$ .

## **Supplementary material and methods**

### **Corticosterone analysis**

The day after the social interaction test, 13 control, 14 susceptible, and 7 resilient animals were sacrificed for blood collection and organ dissection. Animals were deeply anesthetized and the thorax opened. Blood was taken from the right ventricle before transcardial perfusion with ice-cold PBS, collected in EDTA prepared microtubes (Sarstedt, Nümbrecht, Germany) and centrifuged for 5 min at 2000 g. Plasma was taken and stored at  $-20^{\circ}\text{C}$  until analysis. All blood samples were taken within a maximum of 3 min from touching the animal's cage. Corticosterone levels were assessed in duplicates from plasma samples as described before (Buschert et al., 2016) utilizing a commercially available ELISA kit (IBL International GmbH, Hamburg, Germany).

### **Thymus cell count**

The thymus was dissected from 4 control, 5 susceptible and 5 resilient mice the day after the social interaction test, at day 12 of the experiment. A single cell suspension was obtained by pressing the tissue through a 100  $\mu\text{m}$  cell strainer using a syringe plunger. Cells were counted using a CASY cell counter (Roche, Mannheim, Germany).

### **References**

Buschert, J., Sakalem, M.E., Saffari, R., Hohoff, C., Rothermundt, M., Arolt, V., et al. (2016). Prenatal immune activation in mice blocks the effects of environmental enrichment on exploratory behavior and microglia density. *Prog Neuropsychopharmacol Biol Psychiatry* 67, 10-20. doi: 10.1016/j.pnpbp.2016.01.005.
